# Supplementary material
Source: PubMed Central journal article supplement (PMC6265050)
Supplement: NIHMS1510451-supplement-9.pdf [file NIHMS1510451-supplement-9.pdf]

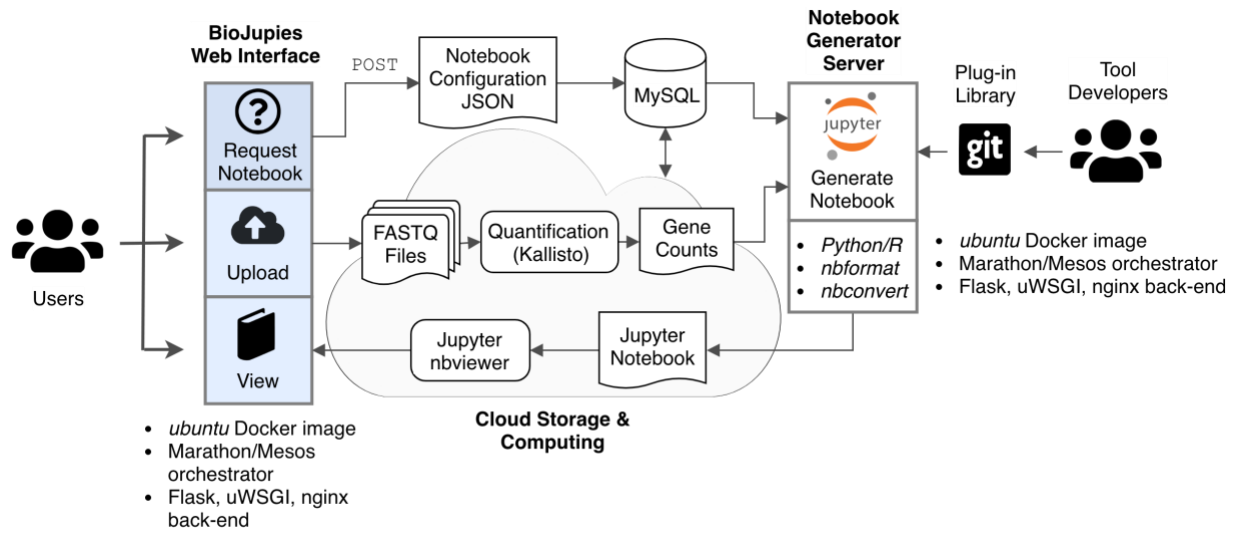

**Figure S1. Components of the BioJupies website and Jupyter Notebook generator server (related to Figure 1, STAR Methods).**

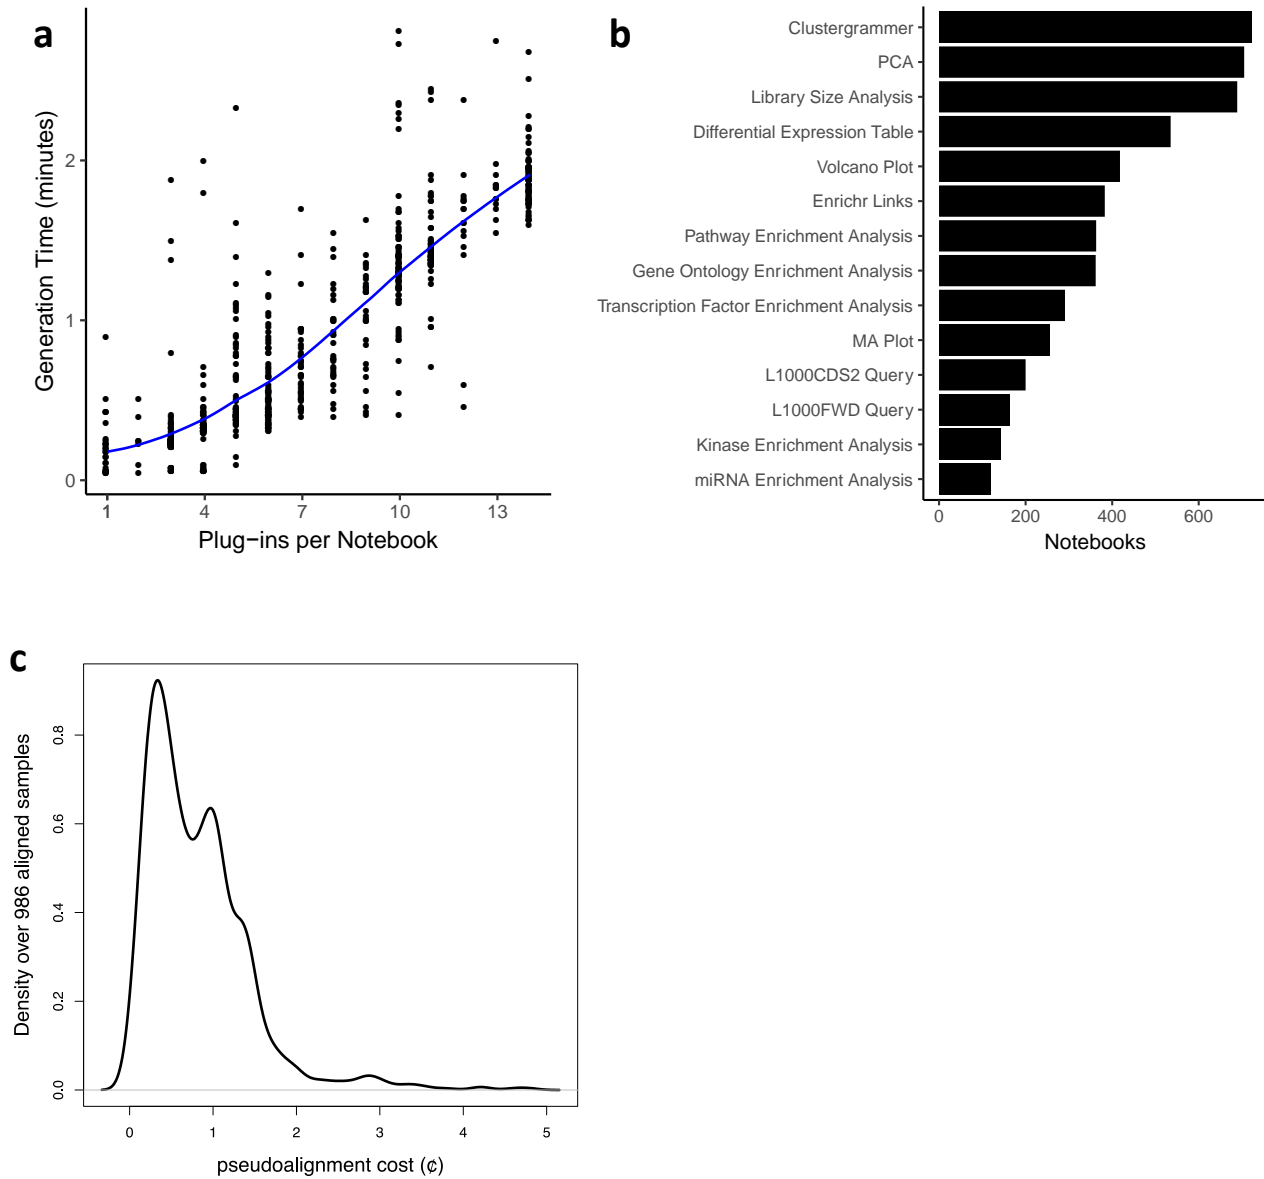

**Figure S2. Notebook generation time, plugin usage and pseudoalignment cost for 986 samples and 722 notebooks generated using BioJupies (related to STAR Methods).** **a.** Notebook generation time in minutes per number of plug-ins selected. **b.** Summary of the most frequently used BioJupies RNA-seq analysis plug-ins. **c.** Distribution of pseudoalignment cost for 986 uploaded FASTQ files incurred by running kallisto on AWS.

| <b>Title</b>                        | <b>Description</b>                                                            | <b>Link</b>                                                             |
|-------------------------------------|-------------------------------------------------------------------------------|-------------------------------------------------------------------------|
| 1. Introduction to BioJupies        | Overview of the features of the BioJupies web server.                         | <a href="https://youtu.be/KMlrW3wb690">https://youtu.be/KMlrW3wb690</a> |
| 2. Analyzing Raw RNA-seq Data       | Instructions for uploading raw FASTQ files for analysis on the cloud.         | <a href="https://youtu.be/9M1ukouB7rE">https://youtu.be/9M1ukouB7rE</a> |
| 3. Analyzing Processed RNA-seq Data | Instructions for uploading processed files containing gene expression counts. | <a href="https://youtu.be/AHWxtaJYdmM">https://youtu.be/AHWxtaJYdmM</a> |
| 4. Analyzing GEO Data               | Instructions for searching >8,000 preprocessed datasets available on GEO.     | <a href="https://youtu.be/09A-l4YoH-A">https://youtu.be/09A-l4YoH-A</a> |
| 5. Generating a Notebook            | Overview of the steps required to generate a notebook.                        | <a href="https://youtu.be/_vtjKuzQqUs">https://youtu.be/_vtjKuzQqUs</a> |
| 6. Exploring the Notebook           | Overview of the contents of a BioJupies notebook.                             | <a href="https://youtu.be/XsCBhBHRUxk">https://youtu.be/XsCBhBHRUxk</a> |
| 7. Reusing Notebooks                | Instructions for downloading and executing notebooks locally.                 | <a href="https://youtu.be/7WFlqIIud4">https://youtu.be/7WFlqIIud4</a>   |
| 8. Using the Chrome Extension       | Overview and instructions for using the BioJupies Chrome browser extension.   | <a href="https://youtu.be/rS8t_E1e4Ms">https://youtu.be/rS8t_E1e4Ms</a> |

**Table S1. BioJupies video tutorials (related to STAR Methods).**
